# Supplementary material for: Synthesis and characterization of poly-l-leucine initialized and immobilized by rehydrated hydrotalcite: understanding stability and the nature of interaction
Source: Royal Society of Chemistry journal article supplement (doi:10.1039/c3cp52187g), 2013-01-01
Supplement: c3cp52187g.pdf [file c3cp52187g.pdf]

## Supporting Information of

# Synthesis and Characterization of Poly-L-Leucine Initialized and Immobilized by Rehydrated Hydrotalcite. Understanding of the Stability and Interaction Nature.

Ronald-Alexander Miranda,<sup>a,b</sup> Elisabetta Finocchio,<sup>c</sup> Jordi Llorca,<sup>d</sup> Francisco Medina,<sup>a,b</sup> Gianguido Ramis,<sup>c</sup> Jesús E. Sueiras,<sup>a,b</sup> and Anna M. Segarra<sup>\*a,b</sup>

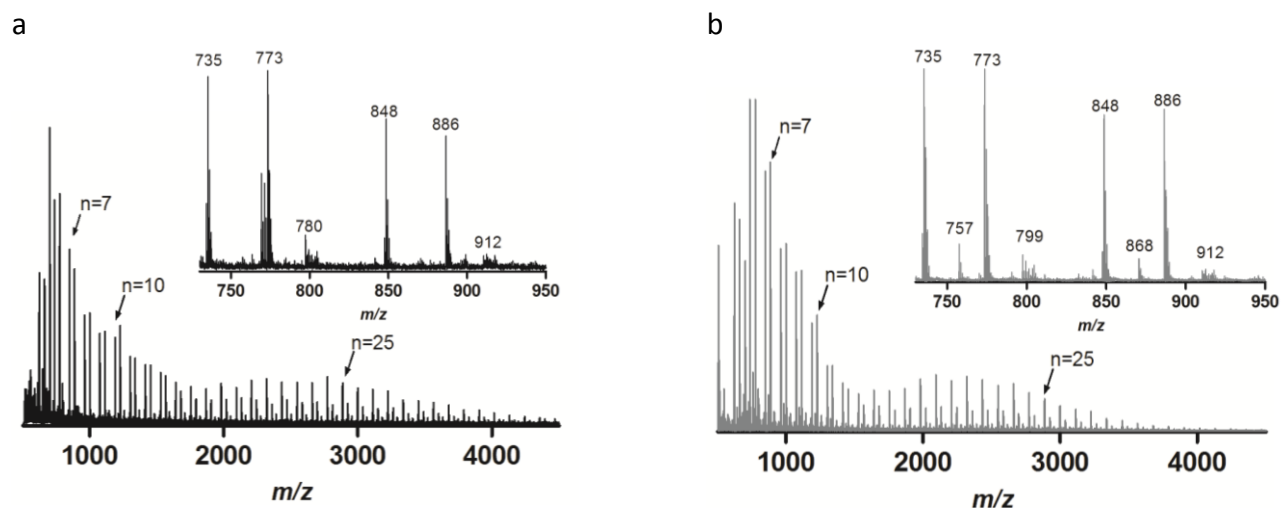

Figure S1 MALDI-TOF MS spectra of a) PLL2 and b) PLL3

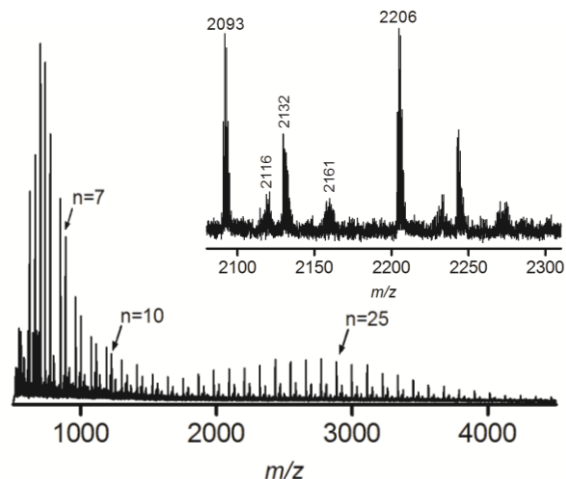

Figure S2 MALDI-TOF MS spectra of PLL1<sub>60</sub>

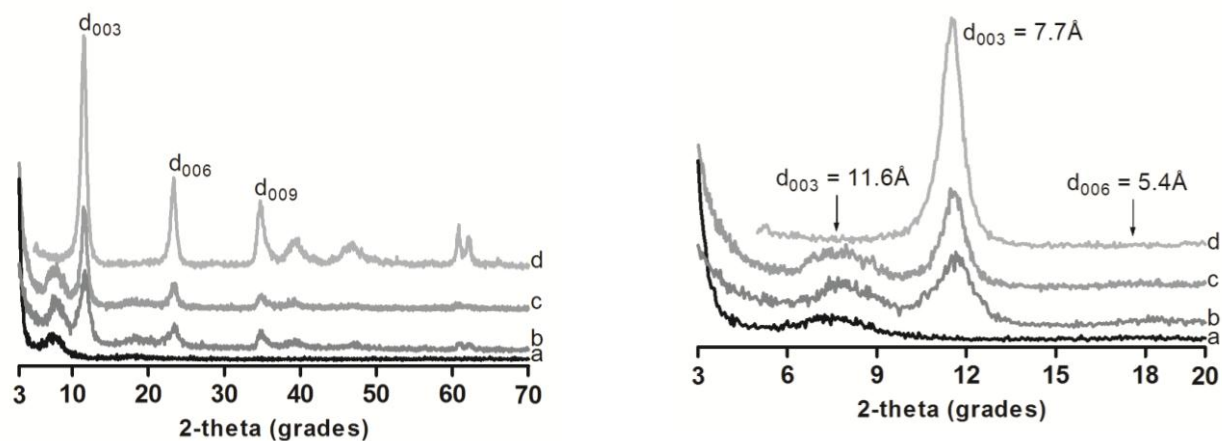

**Figure S3** Left: XRD patterns of a) PLL3, b) IPL3, c) IPL<sub>260</sub> and d) HT<sub>rus</sub>. Right: XRD patterns in the 2θ range: 3-20°

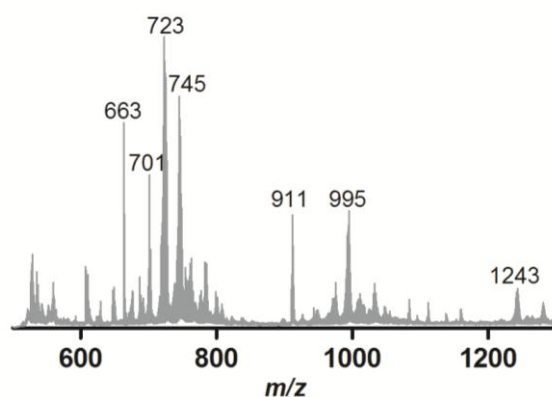

**Figure S4** MALDI-TOF MS spectrum of HT<sub>rus</sub>.

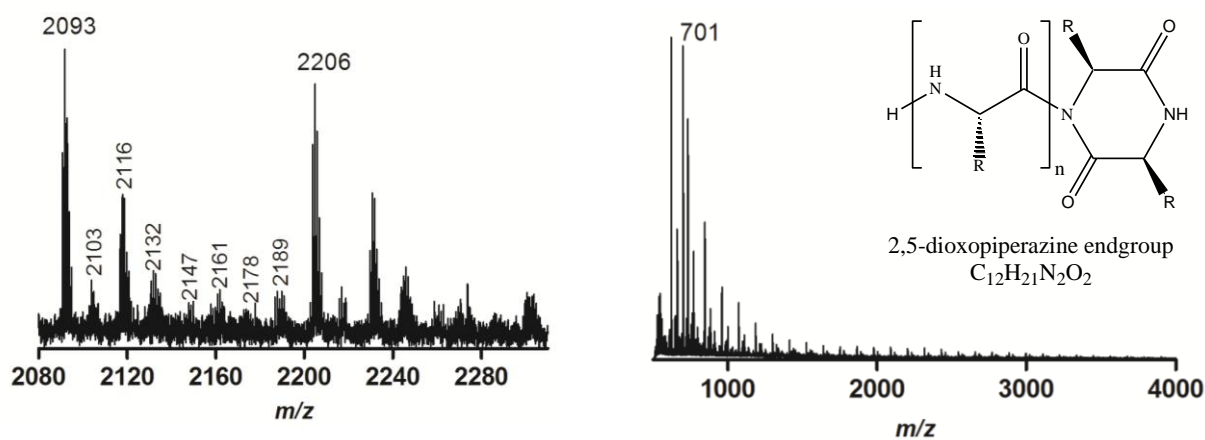

**Figure S5** MALDI-TOF MS spectra of non-immobilized fraction of IPL3. Left: MALDI-TOF spectra in the m/z range: 2080-2310. Right: Entire spectra. See formation of C<sub>12</sub>H<sub>21</sub>N<sub>2</sub>O<sub>2</sub> in W. N. E. van Dijk-Wolthuis, L. van de Water, P. van de Wetering, M. van Steenberg, J. J. Kettenes-van den Bosch, W. Schuyl and

W. E. Hennink. Synthesis and characterization of poly-L-lysine with controlled low molecular weight

*Macromol. Chem. Phys.* **1997**, *198*, 3893.

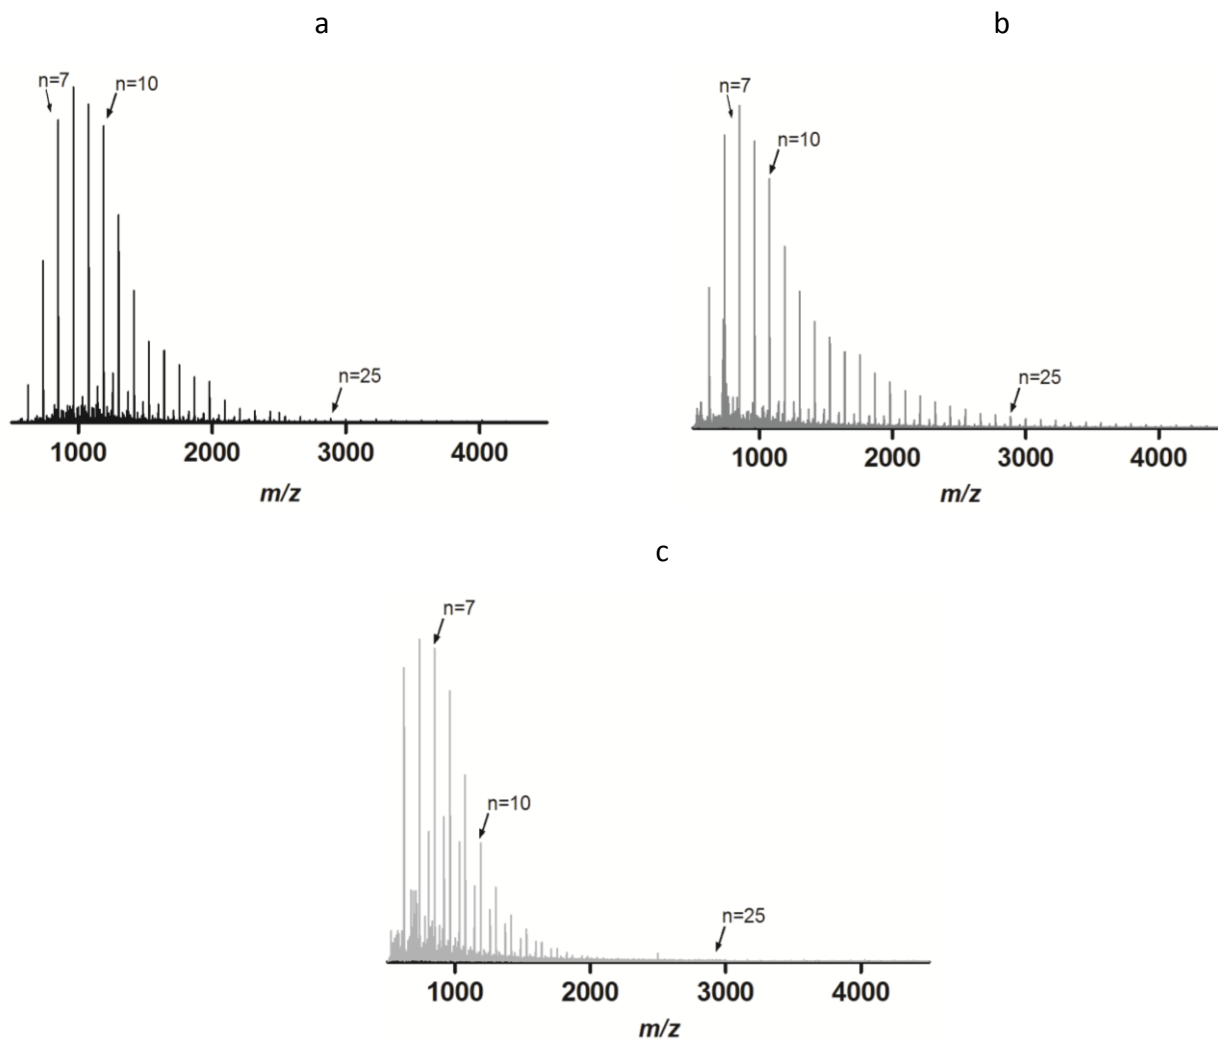

**Figure S6** MALDI-TOF MS spectrum of a) PLL4, b) PLL5 and c) PLL6

**Table S1** Calculated Masses (Da) of PLL4 by MALDI-TOF SM.

| Endgroup | H/OH             |                                    |                                | H/NCA + 46Da     | H/NCA            |                                     | Cyclic           |                 |
|----------|------------------|------------------------------------|--------------------------------|------------------|------------------|-------------------------------------|------------------|-----------------|
|          | + K <sup>+</sup> | + 2K <sup>+</sup> - H <sup>+</sup> | + Na <sup>+</sup> <sup>a</sup> | + K <sup>+</sup> | + K <sup>+</sup> | + H <sup>+</sup> - H <sub>2</sub> O | + H <sup>+</sup> | +K <sup>+</sup> |
| 7        | 847              | 886                                | 833                            | 1030             | 988              | 931                                 | 793              | 831             |
| 8        | 960              | 999                                | 946                            | 1143             | 1101             | 1044                                | 906              | 944             |
| 9        | 1073             | 1112                               | 1058                           | 1256             | 1214             | 1157                                | 1019             | 1057            |
| 10       | 1186             | 1225                               | 1171                           | 1369             | 1327             | 1270                                | 1132             | 1170            |
| 11       | 1299             | 1339                               | 1284                           | 1483             | 1441             | 1384                                | 1245             | 1284            |
| 12       | 1413             | 1452                               | 1397                           | 1596             | 1554             | 1497                                | 1358             | 1397            |

<sup>a</sup>Mass at 1171.8 is calculated as 10\*Leu + H/OH + Na<sup>+</sup>; nevertheless, it could be due to a cyclic polymer chain and calculated as 10\*Leu + H/OH + K<sup>+</sup> - H<sub>2</sub>O.

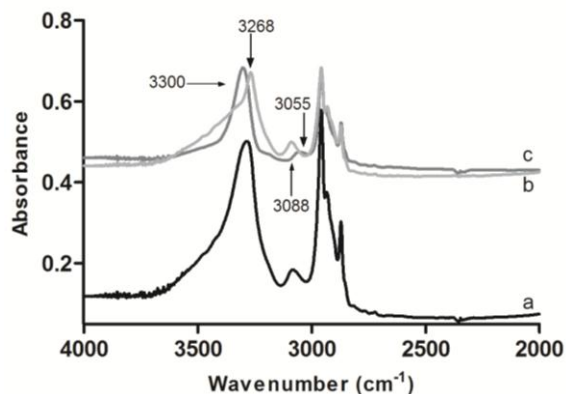

**Figure S7** Skeletal FT-IR spectra of a) PLL4, b) Subtraction spectrum [PLL4 – PLL3] and c) PLL3 in the high frequency region.

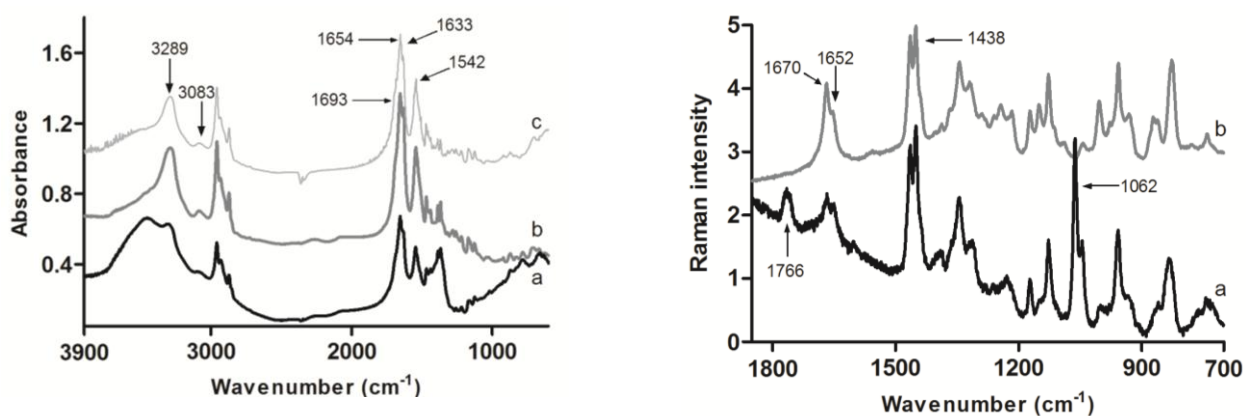

**Figure S8** Skeletal FT-IR spectra (left) of a) PLL5, b) Subtracted spectrum [PLL6 – HT<sub>rus</sub>] and c) PLL6. And Raman spectra (right) of a) PLL5 and b) PLL6.

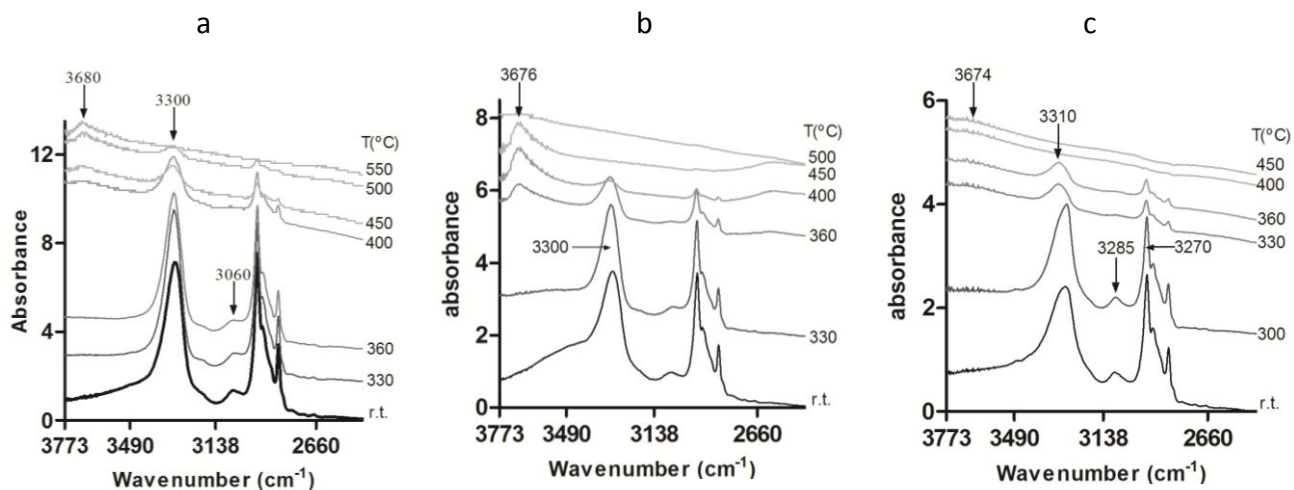

**Figure S9** Skeletal FT-IR spectra in the higher frequency range of a) PLL3, b) IPL2<sub>60</sub> and c) PLL4 in KBr under outgassing conditions at increasing temperature

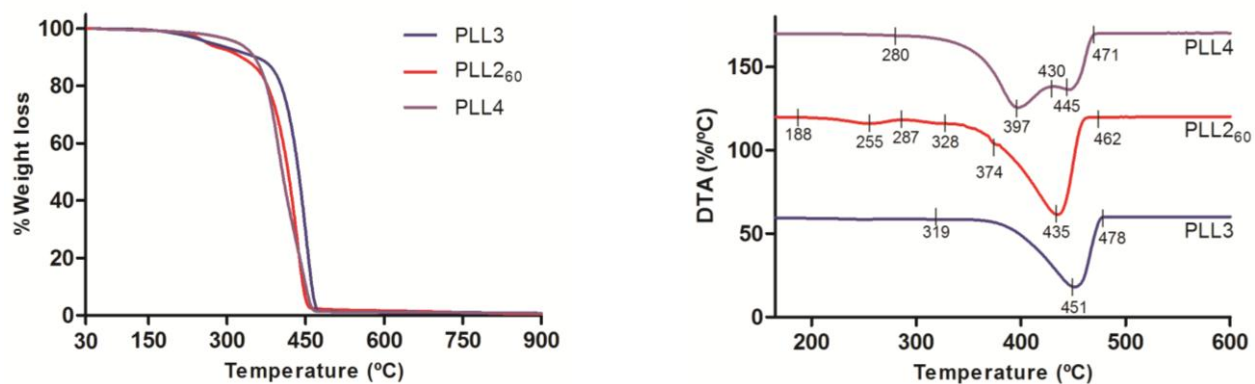

Figure S10 a) TG and b) DTA experiments of PLL3, PLL<sub>260</sub> and PLL4

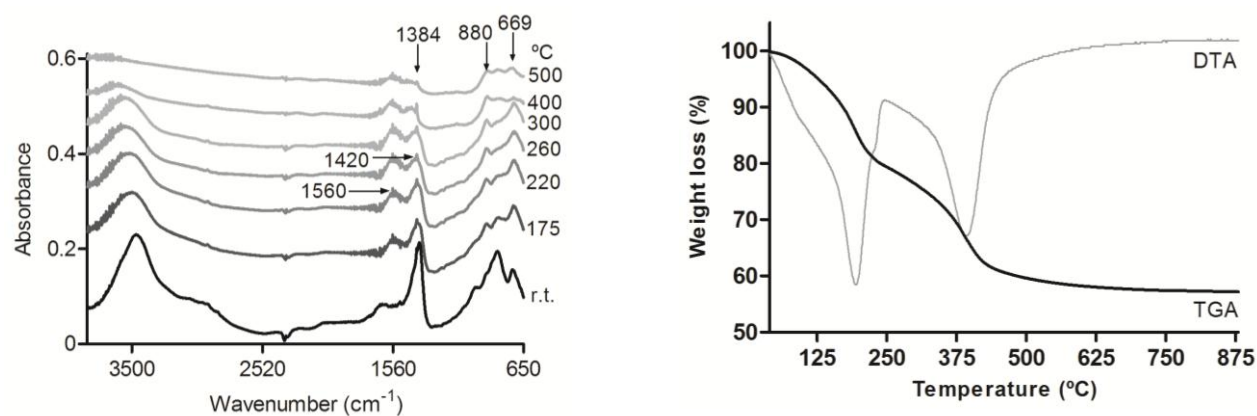

Figure S11 a) FT-IR at increasing temperature and b) TG/DTA experiment of HT<sub>rus</sub>.

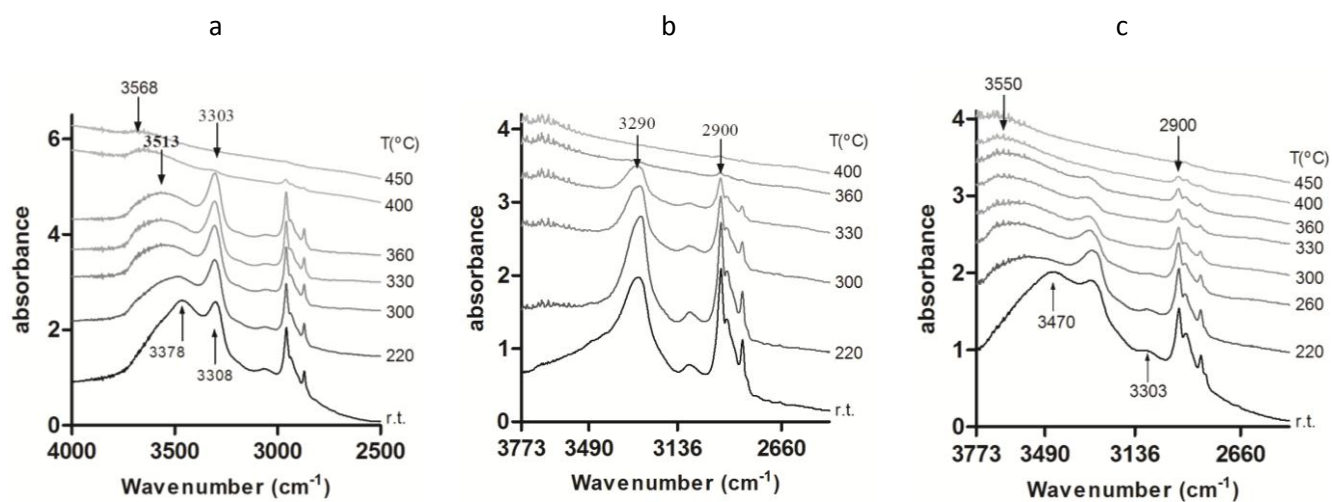

Figure S12 Skeletal FT-IR spectra in the higher frequency range of a) IPL3, b) PLL5 and c) PLL6 in KBr under out-gassing conditions at increasing temperature

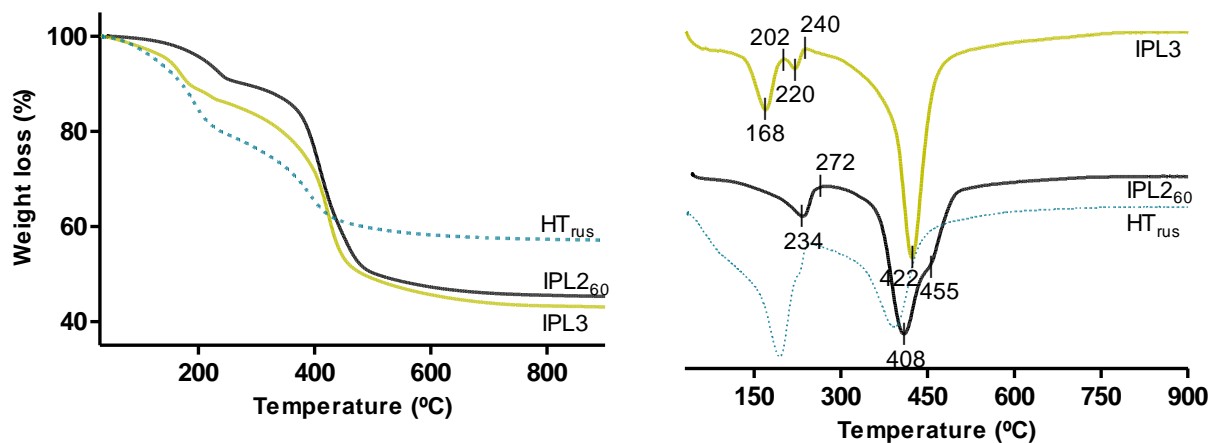

**Figure S13** a) TG and b) DT analyses of IPL3 and IPL<sub>60</sub>. HT<sub>rus</sub> is showed as a reference.

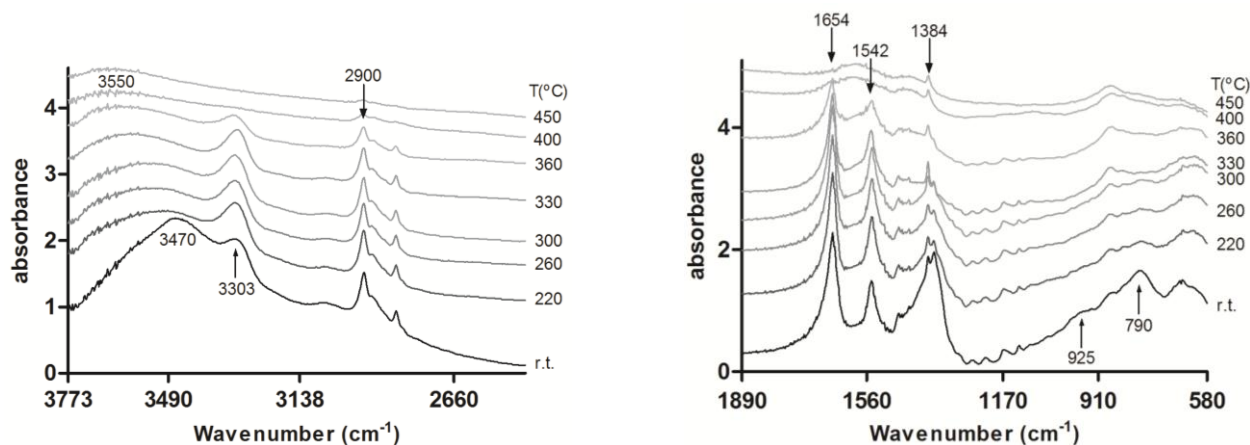

**Figure S14** FT-IR at increasing temperature of IPL<sub>60</sub>.

**Table S2** Relationship between areas of amide I and II bands at increasing temperature

| <b>PLL3</b>             | Amide I             | Amide II            | Amide I/<br>AmideII | <b>IPL3</b>             | Amide I             | Amide II            | Amide I/<br>AmideII |
|-------------------------|---------------------|---------------------|---------------------|-------------------------|---------------------|---------------------|---------------------|
| T (°C)                  | (cm <sup>-1</sup> ) | (cm <sup>-1</sup> ) |                     | T (°C)                  | (cm <sup>-1</sup> ) | (cm <sup>-1</sup> ) |                     |
| 60                      | 1.45                | 0,82                | 1,76                | 60                      | 0,28                | 0,14                | 1,97                |
| 90                      | 1.47                | 0,82                | 1,78                | 90                      | 0,28                | 0,14                | 2,01                |
| 130                     | 1.51                | 0,83                | 1,81                | 130                     | 0,28                | 0,14                | 1,98                |
| 170                     | 1.56                | 0,87                | 1,81                | 170                     | 0,28                | 0,15                | 1,94                |
| 220                     | 1.600               | 0,87                | 1,83                | 220                     | 0,29                | 0,15                | 1,93                |
| 260                     | 1,60                | 0,84                | 1,90                | 260                     | 0,29                | 0,15                | 1,88                |
| 300                     | 1,62                | 0,84                | 1,90                | 300                     | 0,29                | 0,15                | 1,88                |
| 330                     | 1,61                | 0,86                | 1,88                | 330                     | 0,29                | 0,15                | 1,89                |
| 360                     | 1,46                | 0,84                | 1,26                | 360                     | 0,28                | 0,15                | 1,89                |
| 400                     | 0,58                | 0,75                | 1,93                |                         |                     |                     |                     |
| <b>PLL<sub>60</sub></b> | Amide I             | Amide II            | Amide I/<br>AmideII | <b>IPL<sub>60</sub></b> | Amide I             | Amide II            | Amide I/<br>AmideII |
| T (°C)                  | (cm <sup>-1</sup> ) | (cm <sup>-1</sup> ) |                     | T (°C)                  | (cm <sup>-1</sup> ) | (cm <sup>-1</sup> ) |                     |
| 60                      | 0,60                | 0,35                | 1,72                | 60                      | 0,16                | 0,08                | 2,06                |
| 90                      | 0,60                | 0,35                | 1,73                | 90                      | 0,16                | 0,08                | 2,08                |
| 130                     | 0,61                | 0,36                | 1,73                | 130                     | 0,16                | 0,08                | 2,04                |

|     |      |      |      |     |      |      |      |
|-----|------|------|------|-----|------|------|------|
| 170 | 0,63 | 0,36 | 1,73 | 170 | 0,16 | 0,08 | 2,03 |
| 220 | 0,65 | 0,37 | 1,74 | 220 | 0,16 | 0,08 | 1,99 |
| 260 | 0,67 | 0,38 | 1,78 | 260 | 0,16 | 0,09 | 1,80 |
| 300 | 0,68 | 0,38 | 1,79 | 300 | 0,16 | 0,09 | 1,78 |
| 330 | 0,68 | 0,37 | 1,83 | 330 | 0,16 | 0,09 | 1,74 |
| 360 | 0,66 | 0,36 | 1,86 | 360 | 0,13 | 0,07 | 1,75 |
| 400 | 0,37 | 0,19 | 1,94 |     |      |      |      |

---
